# Supplementary material for: Efficient removal of high- or low-concentration copper ions using diethylenetriamine-grafted electrospun polyacrylonitrile fibers
Source: Royal Society of Chemistry journal article supplement (doi:10.1039/d2nj05789a), 2023-01-01
Supplement: d2nj05789a1.pdf [file d2nj05789a1.pdf]

## Supporting information

### **Efficient removal of high- or low-concentration copper ions *via* diethylenetriamine-grafted electrospun polyacrylonitrile fibers**

Yuyin Zhang<sup>a,#</sup>, Keyu Wang<sup>a,#</sup>, Gaigai Duan<sup>b,\*</sup>, Yiming Chen<sup>c,\*</sup>, Kunming Liu<sup>d</sup>, Haoqing Hou<sup>a,\*</sup>

<sup>a</sup> *College of Chemistry and Chemical Engineering, Jiangxi Normal University, Nanchang 330027, China.*

<sup>b</sup> *Jiangsu Co-Innovation Center of Efficient Processing and Utilization of Forest Resources, International Innovation Center for Forest Chemicals and Materials, College of Materials Science and Engineering, Nanjing Forestry University, Nanjing 210037, China.*

<sup>c</sup> *Key Laboratory of Urban Rail Transit Intelligent Operation and Maintenance Technology & Equipment of Zhejiang Province, College of Engineering, Zhejiang Normal University, Jinhua 321004, China.*

<sup>d</sup> *School of Metallurgical and Chemical Engineering, Jiangxi University of Science and Technology, Ganzhou 341000, China.*

\*Emails: duangaigai@njfu.edu.cn (G. Duan); yiming.chen@zjnu.edu.cn (Y. Chen); haoqing@jxnu.edu.cn

(H. Hou)

# These two authors contributed equally to this work.

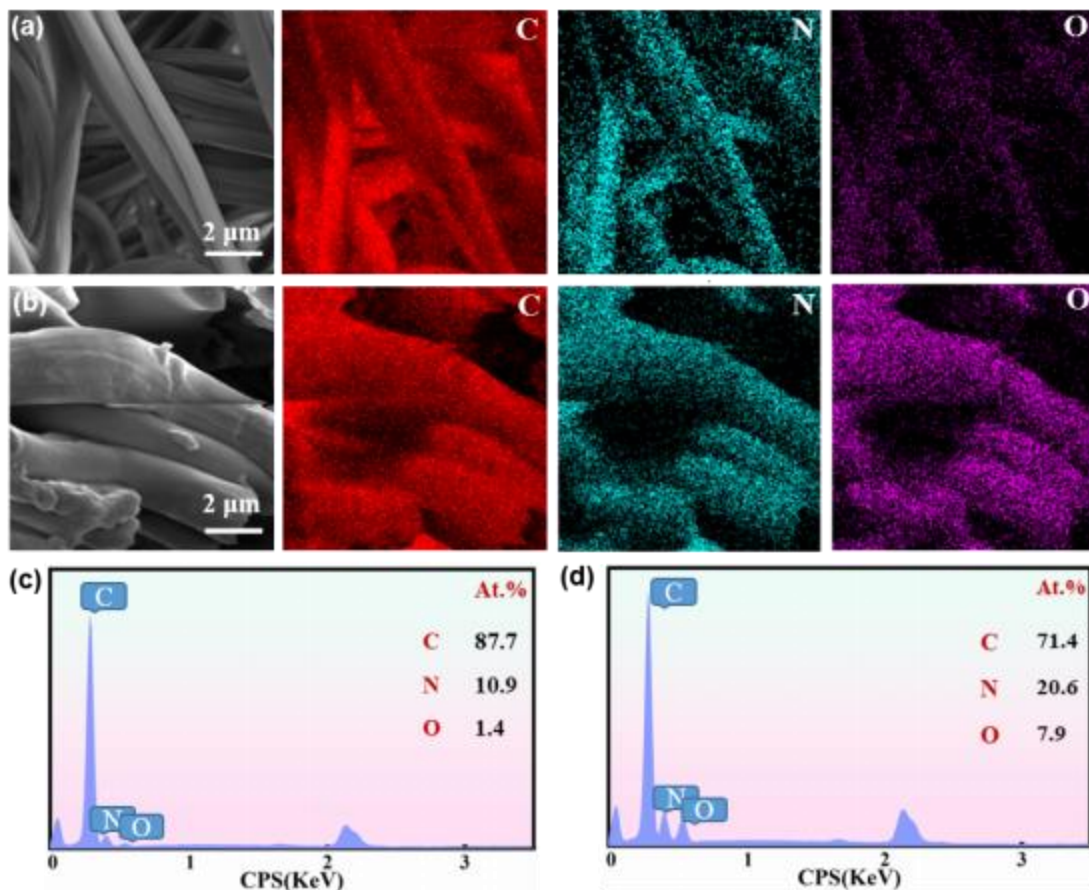

**Fig. S1.** Mapping of (a) PANFs and (b) PAN-DETA; EDS of (c) PANFs and (d) PAN-DETA.

From the structural analysis of PANFs and PAN-DETA, it could be seen that both fibers contained C, N, and O elements, but the content of elements was different. The PANFs had a smooth surface with a certain distance between fibers (Fig. S1a). And the C, N, and O elements were evenly distributed on the surface of PANFs. After the reaction, PAN-DETA expanded and the surface became rough due to the addition of DETA (Fig. S1b). As shown in Fig. S1 c and d, the N and O contents of PAN-DETA increased significantly compared to PANFs. The results showed that the DETA was successfully grafted onto the surface of PANFs.

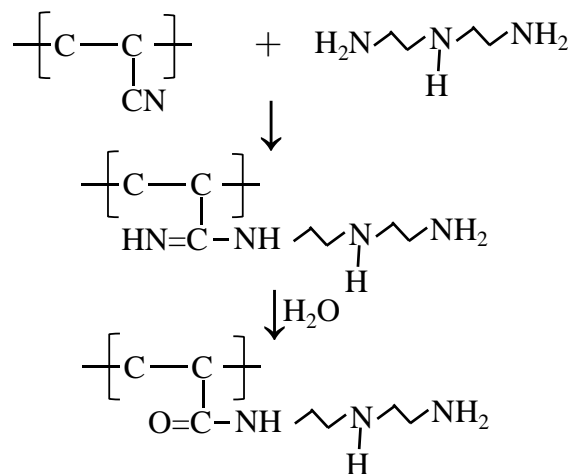

**Fig. S2.** The principle of DETA branching on PAN.

**Table S1.** The comparison of the maximum adsorption capacities of PAN-DETA and reported adsorbents.

| Adsorbents                            | Adsorption equilibrium time | $q_{max}$ | Ref.             |
|---------------------------------------|-----------------------------|-----------|------------------|
|                                       | (min)                       | (mg/g)    |                  |
| PAO                                   | 500                         | 17.34     | 1                |
| ICF                                   | 120                         | 14.8      | 2                |
| DAVFs-Cs                              | 660                         | 322       | 3                |
| C2@3-HPS#500                          | 350                         | 493       | 4                |
| PAN <sub>p</sub> -PMODF               | 300                         | 150.44    | 5                |
| MgFe <sub>2</sub> O <sub>4</sub>      | 120                         | 283.13    | 6                |
| PAN/TiO <sub>2</sub> /PANI            | 300                         | 16.6      | 7                |
| PP-PAM                                | 300                         | 171.30    | 8                |
| PANI/JF                               | 30                          | 8.43      | 9                |
| Kapok fibers                          | 120                         | 2.35      | 10               |
| Fe <sub>3</sub> O <sub>4</sub> fibers | 50                          | 16.78     | 11               |
| PAAc                                  | 60                          | 7.18      | 12               |
| PAN/PEI/MWCNT-COOH                    | 480                         | 346       | 13               |
| PAN/TiO <sub>2</sub> -CS              | 60                          | 160.1     | 14               |
| Nonwoven geotextiles                  | 840                         | 38.99     | 15               |
| PAN-DETA                              | 180                         | 349.25    | <b>This work</b> |

## References

1. F. Ma, B. Dong, Y. Gui, M. Cao, L. Han, C. Jiao, H. Lv, J. Hou and Y. Xue, *Ind. Eng. Chem. Res.*, 2018, **57**, 17384-17393.
2. J. Mao, S. Lin, X. J. Lu, X. H. Wu, T. Zhou and Y. S. Yun, *Environ. Res.*, 2020, **182**, 108995.
3. F. Liu, S. Hua, L. Zhou and B. Hu, *Int. J. Biol. Macromol.*, 2021, **173**, 457-466.
4. C. Xu, S. Shi, X. Wang, H. Zhou, L. Wang, L. Zhu, G. Zhang and D. Xu, *J. Hazard. Mater.*, 2020,

**381**, 120974.

5. H. Du, Y. Xie, H. Zhang, A. Chima, M. Tao and W. Zhang, *Ind. Eng. Chem. Res.*, 2020, **59**, 13333-13342.
6. S. Shi, Q. Dong, Y. Wang, X. Zhang, S. Zhu, Y. T. Chow, X. Wang, L. Zhu, G. Zhang and D. Xu, *Sep. Purif. Technol.*, 2021, **266**, 118584.
7. B. Xu, X. Wang, Y. Huang, J. Liu, D. Wang, S. Feng, X. Huang and H. Wang, *Chem. Eng. J.*, 2020, **399**, 125749.
8. C. Liu, J. Jia, J. a. Liu and X. Liang, *Adsorpt. Sci. Technol.*, 2017, **36**, 287-299.
9. Q. Huang, D. Hu, M. Chen, C. Bao and X. Jin, *J. Mol. Liq.*, 2019, **285**, 288-298.
10. R. Wang, C.-H. Shin, D. Kim, M. Ryu and J.-S. Park, *Environ. Earth Sci.*, 2016, **75**, 338.
11. S. Shi, C. Xu, X. Wang, Y. Xie, Y. Wang, Q. Dong, L. Zhu, G. Zhang and D. Xu, *Materials & Design*, 2020, **186**, 108298.
12. M. S. Hassan and M. H. Zohdy, *J. Nat. Fibers*, 2018, **15**, 506-516.
13. W. Guo, R. Guo, H. Pei, B. Wang, N. Liu and Z. Mo, *Colloids Surf., A*, 2022, **641**, 128557.
14. H. F. Alharbi, M. Y. Haddad, M. O. Aijaz, A. K. Assaifan and M. R. Karim, *Coatings*, 2020, **10**, 285.
15. W. Tan, L. Zhang, F. Fu, S. Bowman, P. Wang, Y. Li and Y. Zhang, *J. Cleaner Prod.*, 2021, **329**, 129788.
